# Supplementary material for: Safety and effectiveness of long-term use of darbepoetin alfa in non-dialysis patients with chronic kidney disease: a post-marketing surveillance study in Japan
Source: PubMed Central journal article supplement (PMC6510805; doi:10.1007/s10157-018-1632-9), 2018-09-04
Supplement: 10157_2018_1632_MOESM1_ESM.pdf [file 10157_2018_1632_MOESM1_ESM.pdf]

**Online Resource 3.** Analysis of time to first outcome of composite renal endpoints, including death, in the patients in the effectiveness analysis set with available Hb levels at 3 months after the start of darbepoetin administration were stratified by Hb <11 g/dL or  $\geq$ 11 g/dL.

(a) All patients.

(b) Patients whose baseline Hb levels were <11 g/dL. Composite renal endpoints: 50% reduction in eGFR, initiation of dialysis, kidney transplantation, or death.

Abbreviations: eGFR, estimated glomerular filtration rate; Hb, hemoglobin

# Online Resource 3a.

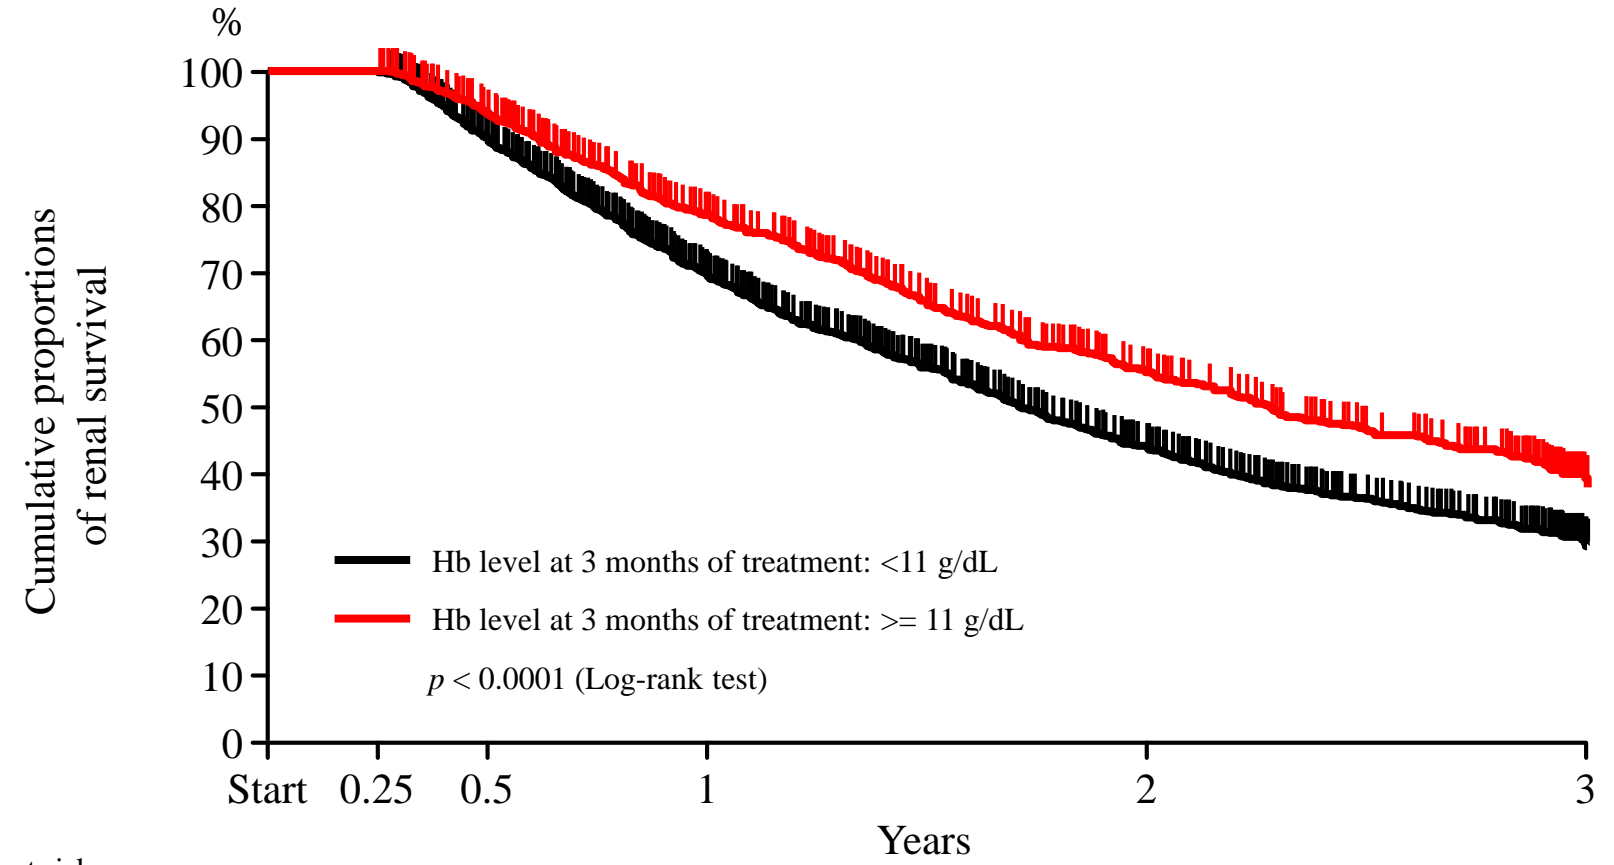

| Number at risk                               |                                      |
|----------------------------------------------|--------------------------------------|
| Hb level at 3 months of treatment: <11 g/dL  | 2380   2380   1988   1331   653   48 |
| Hb level at 3 months of treatment: >=11 g/dL | 1093   1093   950   711   413   31   |

# Online Resource 3b.

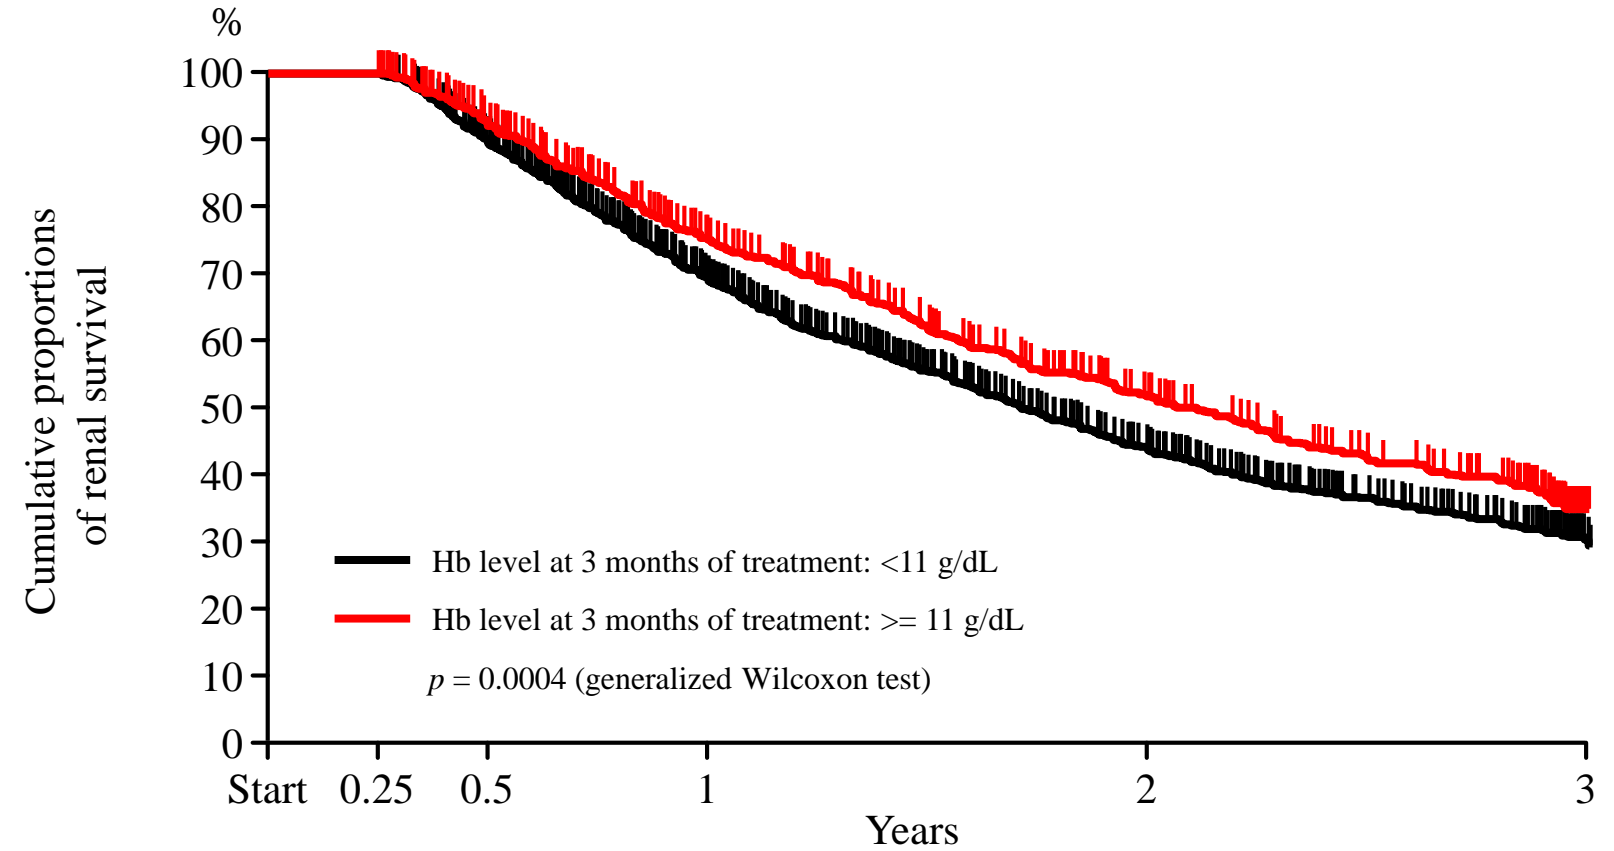

| Number at risk                               |       |      |      |      |     |    |
|----------------------------------------------|-------|------|------|------|-----|----|
|                                              | Start | 0.25 | 0.5  | 1    | 2   | 3  |
| Hb level at 3 months of treatment: <11 g/dL  | 2147  | 2147 | 1793 | 1194 | 588 | 41 |
| Hb level at 3 months of treatment: >=11 g/dL | 818   | 818  | 699  | 498  | 278 | 20 |
