# Supplementary material for: Safety and effectiveness of long-term use of darbepoetin alfa in non-dialysis patients with chronic kidney disease: a post-marketing surveillance study in Japan
Source: PubMed Central journal article supplement (PMC6510805; doi:10.1007/s10157-018-1632-9), 2018-09-04
Supplement: 10157_2018_1632_MOESM2_ESM.pdf [file 10157_2018_1632_MOESM2_ESM.pdf]

## Supplementary Materials

### Online Resource 1. Changes in Hb levels and doses of darbepoetin administration stratified by dosing intervals

|                                                           | Dosing intervals       | Observation period (years) |        |         |      |        |         |      |        |         |      |        |         |      |        |       |      |        |       |
|-----------------------------------------------------------|------------------------|----------------------------|--------|---------|------|--------|---------|------|--------|---------|------|--------|---------|------|--------|-------|------|--------|-------|
|                                                           |                        | Baseline                   |        | 0.25    |      | 0.5    |         | 1    |        | 2       |      | 3      |         |      |        |       |      |        |       |
| Hb level<br>(g/dL)                                        | <2 weeks               | 8.9                        | ± 1.2  | (294)   | 10.1 | ± 1.6  | (83)    | 9.9  | ± 1.5  | (61)    | 10.2 | ± 1.2  | (51)    | 10.3 | ± 1.1  | (24)  | 9.8  | ± 1.0  | (15)  |
|                                                           | >=2 weeks,<br><3 weeks | 9.3                        | ± 1.2  | (1,235) | 10.2 | ± 1.5  | (672)   | 10.3 | ± 1.4  | (485)   | 10.2 | ± 1.4  | (334)   | 10.5 | ± 1.5  | (134) | 10.4 | ± 1.3  | (98)  |
|                                                           | >=3 weeks,<br><5 weeks | 9.6                        | ± 1.1  | (1,900) | 10.3 | ± 1.3  | (1,707) | 10.3 | ± 1.2  | (1,485) | 10.5 | ± 1.2  | (1,098) | 10.5 | ± 1.2  | (655) | 10.7 | ± 1.1  | (376) |
|                                                           | >=5 weeks              | 9.7                        | ± 1.0  | (1,272) | 10.4 | ± 1.2  | (1,655) | 10.4 | ± 1.2  | (1,526) | 10.5 | ± 1.2  | (1,116) | 10.6 | ± 1.2  | (666) | 10.5 | ± 1.1  | (242) |
|                                                           | <2 weeks               | 54.6                       | ± 31.8 | (334)   | 65.2 | ± 34.8 | (87)    | 78.2 | ± 48.9 | (68)    | 76.3 | ± 60.0 | (54)    | 72.3 | ± 38.4 | (27)  | 92.9 | ± 52.9 | (35)  |
| Dose of<br>darbepoetin<br>administration<br>(µg per week) | >=2 weeks,<br><3 weeks | 39.3                       | ± 18.2 | (1,374) | 46.8 | ± 24.7 | (700)   | 50.2 | ± 27.3 | (519)   | 54.0 | ± 30.6 | (357)   | 57.5 | ± 32.9 | (154) | 62.8 | ± 40.0 | (157) |
|                                                           | >=3 weeks,<br><5 weeks | 27.3                       | ± 14.9 | (2,069) | 30.4 | ± 16.4 | (1,763) | 33.6 | ± 19.4 | (1,549) | 35.3 | ± 20.5 | (1,154) | 37.1 | ± 22.4 | (693) | 38.4 | ± 22.5 | (585) |
|                                                           | >=5 weeks              | 17.5                       | ± 10.6 | (1,350) | 19.7 | ± 12.9 | (1,755) | 19.4 | ± 13.5 | (1,635) | 21.3 | ± 15.8 | (1,201) | 23.1 | ± 16.7 | (744) | 25.9 | ± 16.6 | (422) |

Data are shown as mean  $\pm$  standard deviation and number of patients in parentheses. Abbreviation: Hb, hemoglobin

**Online Resource 2.** Multivariate Cox Regression analysis in composite renal endpoints including death

| Factors                                                            | No. of patients | No. of patients          |              | HR (95% CI)         | <i>p</i> value |
|--------------------------------------------------------------------|-----------------|--------------------------|--------------|---------------------|----------------|
|                                                                    |                 | with renal endpoints (%) |              |                     |                |
| Hb level at 3 months after the start of darbepoetin administration | <11 g/dL        | 2,380                    | 1,255 (52.7) | Ref                 |                |
|                                                                    | >=11 g/dL       | 1,093                    | 503 (46.0)   | 0.745 (0.623–0.890) | 0.0012         |
| Sex                                                                | Male            | 2,412                    | 1,262 (52.3) | Ref                 |                |
|                                                                    | Female          | 2,032                    | 882 (43.4)   | 0.622 (0.531–0.729) | <0.0001        |
| Age (years)                                                        | <65             | 999                      | 597 (59.8)   | Ref                 |                |
|                                                                    | >=65 to <75     | 1,195                    | 603 (50.5)   | 0.817 (0.675–0.989) | 0.0383         |
|                                                                    | >=75            | 2,250                    | 944 (42.0)   | 0.775 (0.641–0.936) | 0.0082         |
| Diabetes                                                           | No              | 2,567                    | 1,150 (44.8) | Ref                 |                |
|                                                                    | Yes             | 1,877                    | 994 (53.0)   | 1.180 (1.009–1.380) | 0.0378         |
| Transfusion                                                        | No              | 4,047                    | 1,893 (46.8) | Ref                 |                |
|                                                                    | Yes             | 364                      | 243 (66.8)   | 1.614 (1.248–2.088) | 0.0003         |

|                                             |                     |       |       |        |       |               |         |
|---------------------------------------------|---------------------|-------|-------|--------|-------|---------------|---------|
| Baseline systolic blood pressure (mmHg)     |                     | 1,519 | 640   | (42.1) | Ref   |               |         |
|                                             | <130                |       |       |        |       |               |         |
|                                             | >=130 to <140       | 851   | 416   | (48.9) | 1.389 | (1.134–1.701) | 0.0015  |
|                                             | >=140               | 1,480 | 843   | (57.0) | 1.326 | (1.110–1.583) | 0.0019  |
| Baseline eGFR (mL/min/1.73 m <sup>2</sup> ) |                     | 1,791 | 1,172 | (65.4) | 2.906 | (2.086–4.048) | <0.0001 |
|                                             | <15                 |       |       |        |       |               |         |
|                                             | >=15 to <30         | 1,729 | 698   | (40.4) | 1.346 | (0.960–1.887) | 0.0850  |
|                                             | >=30                | 538   | 141   | (26.2) | Ref   |               |         |
| Baseline urine protein (mg/dL)              | continuous quantity | 2,033 | 1,003 | (49.3) | 1.001 | (1.001–1.001) | <0.0001 |
| Dose of darbepoetin administered per week   |                     | 2,220 | 882   | (39.7) | Ref   |               |         |
|                                             | <Median             |       |       |        |       |               |         |
|                                             | >=Median            | 2,224 | 1,262 | (56.7) | 1.505 | (1.287–1.761) | <0.0001 |
| Concurrent use of antihypertensive agent    |                     | 650   | 260   | (40.0) | Ref   |               |         |
|                                             | No                  |       |       |        |       |               |         |
|                                             | Yes                 | 3,794 | 1,884 | (49.7) | 1.425 | (1.053–1.929) | 0.0218  |

---

Patients in the effectiveness analysis set regarding Hb levels and eGFR who received darbepoetin for more than 3 months and did not develop any of the endpoints evaluated within 3 months of darbepoetin administration were included in this analysis (n = 4,444).

The following variables were selected as explanatory variables: Hb level at baseline, sex, age, body mass index, history, diabetes, previous treatment with recombinant human erythropoietin, transfusion, baseline systolic blood pressure, baseline diastolic blood pressure, baseline eGFR, increase rate of Hb level during darbepoetin administration for 4 weeks, baseline urine protein (spot urine), dose of darbepoetin administered per week, antihypertensive agent, antithrombotic agent, and lipid-lowering agent.

Time (days) to composite renal endpoints (either 50% reduction in eGFR, initiation of dialysis, kidney transplantation, or death).

P values for the trend (Wald chi-square test [type 3]) were  $p = 0.0213$  for age,  $p = 0.0012$  for baseline systolic blood pressure, and  $p < 0.0001$  for baseline eGFR.

The median (25<sup>th</sup>, 75<sup>th</sup> percentiles) of darbepoetin dose administered per week was 15.4 (10.3, 23.2)  $\mu\text{g}$ .

Abbreviations: Hb, hemoglobin; HR, hazard ratio; CI, confidence interval; eGFR, estimated glomerular filtration rate
